# Supplementary material for: Reduced crown root number improves water acquisition under water deficit stress in maize (Zea mays L.)
Source: PubMed Central journal article supplement (PMC4973737; doi:10.1093/jxb/erw243), 2016-07-08
Supplement: supp_erw243_supplementary_figure_S5_tables_S1_S8.pdf [file supp_erw243_supplementary_figure_S5_tables_S1_S8.pdf]

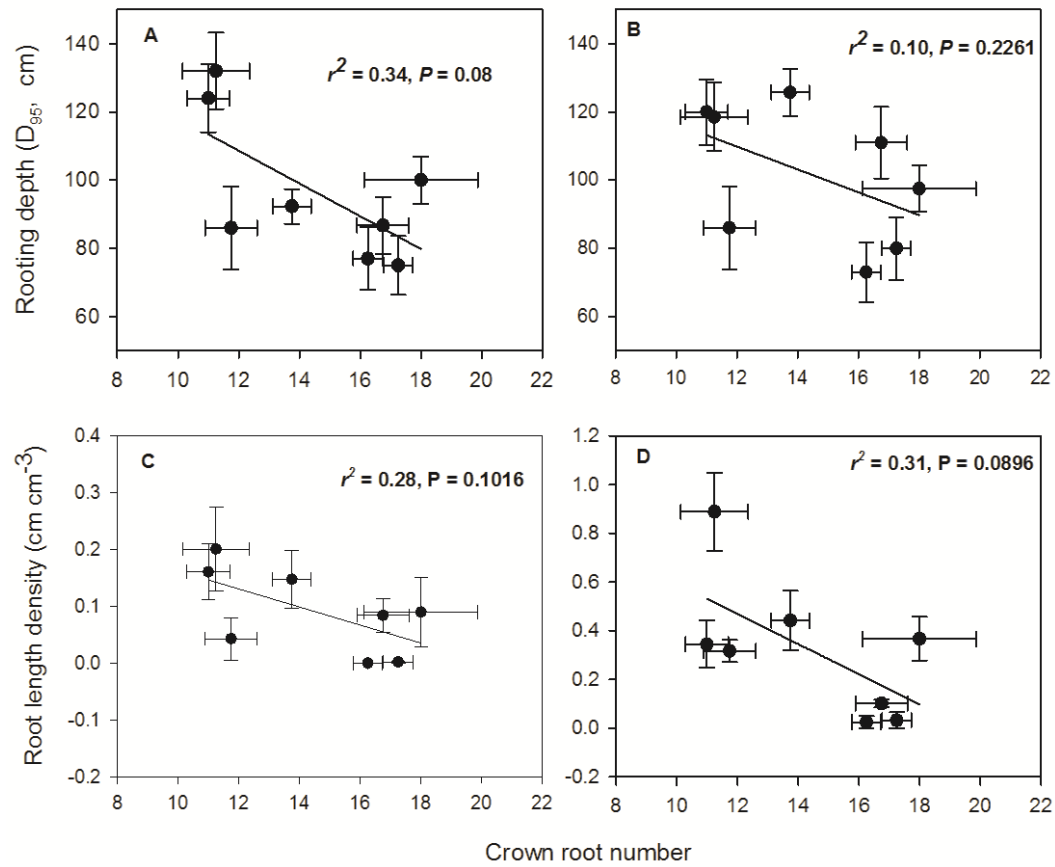

**Supplemental Figure S5.** Correlations between crown root number and rooting depth (D<sub>95</sub>, cm) and root length density (cm cm<sup>-3</sup>) of primary roots (PR) (A and C) and seminal roots (SR) (B and D) from 80-140 cm soil depths of maize at 35 DAP in greenhouse mesocosms under water-stressed conditions. Each point is means of four replicates of each genotype  $\pm$  SE.

**Supplemental Table 1.** Summary of analysis of variance for crown root number (CN), shoot dry weight (SDW), leaf relative water content (LRWC, %), leaf photosynthesis (LPn,  $\mu\text{mol CO}_2 \text{ m}^{-2} \text{ s}^{-1}$ ), leaf stomatal conductance (LSC,  $\text{mol H}_2\text{O m}^{-2} \text{ s}^{-1}$ ), canopy photosynthesis (CPn,  $\mu\text{mol CO}_2 \text{ s}^{-1} \text{ plant}^{-1}$ ), total root respiration (TRS,  $\mu\text{mol CO}_2 \text{ s}^{-1} \text{ plant}^{-1}$ ) and specific root respiration (SRR,  $\text{pmol CO}_2 \text{ cm}^{-1} \text{ root length s}^{-1}$ ) at 35 days after planting (DAP) in greenhouse mesocosms as influenced by soil moisture regimes (treatment (T)), genotypes (G), crown root phenotypes (P) and their interactions. The associated F-values and probabilities (NS, not significant; \*,  $P < 0.1$ ; \*\*,  $P < 0.01$ ; \*\*\*,  $P < 0.001$ ) are shown.

| Source of variation | CN        | SDW       | LRWC      | LPn       | LSC       | CPn       | TRS       | SRR      |
|---------------------|-----------|-----------|-----------|-----------|-----------|-----------|-----------|----------|
| Treatment (T)       | 121.19*** | 277.12*** | 508.03*** | 569.17*** | 429.55*** | 119.89*** | 201.98*** | 50524*** |
| Genotype (G)        | 16.57***  | 5.27***   | 3.05*     | 25.59***  | 4.69***   | 1.83NS    | 1.01NS    | 2039.73* |
| G × T               | 0.94NS    | 3.28**    | 5.13***   | 15.48***  | 3.73**    | 2.83*     | 0.32NS    | 142.29NS |
| phenotypes (P)      | 107.03*** | 2.96*     | 17.71***  | 49.33***  | 11.76***  | 8.19***   | 0.92NS    | 791.07NS |
| P × T               | 4.61*     | 7.78*     | 34.71***  | 36.81***  | 20.72***  | 21.15***  | 0.76NS    | 190.61NS |

**Supplemental Table 2.** Analysis of the effect of plasticity of IBM123 at field and NYH51 in the greenhouse in water stress (WS) conditions A) All replications of genotype IBM123 and NYH51 classified as low crown root number (LCN); B) All replications of IBM123 and NYH51 classified as high crown root number (HCN); C) IBM123 and NYH51 removed from dataset.

|          | CO <sub>2</sub> assimilation rate ( $\mu\text{mol CO}_2 \text{ m}^{-2} \text{ s}^{-1}$ ) |      | Stomatal conductance ( $\text{mmol H}_2\text{O m}^{-2} \text{ s}^{-1}$ ) |      | Leaf relative water content (%) |      | Net canopy assimilation ( $\mu\text{mol CO}_2 \text{ s}^{-1} \text{ plant}^{-1}$ ) |       | Total root respiration ( $\mu\text{mol CO}_2 \text{ s}^{-1} \text{ plant}^{-1}$ ) |      | Crown root number |      | D <sub>95</sub> (cm) |      |
|----------|------------------------------------------------------------------------------------------|------|--------------------------------------------------------------------------|------|---------------------------------|------|------------------------------------------------------------------------------------|-------|-----------------------------------------------------------------------------------|------|-------------------|------|----------------------|------|
|          | LCN                                                                                      | HCN  | LCN                                                                      | HCN  | LCN                             | HCN  | LCN                                                                                | HCN   | LCN                                                                               | HCN  | LCN               | HCN  | LCN                  | HCN  |
| IBM123   |                                                                                          |      |                                                                          |      |                                 |      |                                                                                    |       |                                                                                   |      |                   |      |                      |      |
| <b>A</b> | 25.3                                                                                     | 19.7 | 0.24                                                                     | 0.17 | 86.3                            | 77.2 | -                                                                                  | -     | -                                                                                 | -    | 30.8              | 39.2 | 52.2                 | 36.8 |
| <b>B</b> | 25.7                                                                                     | 20.6 | 0.25                                                                     | 0.18 | 87.0                            | 78.5 | -                                                                                  | -     | -                                                                                 | -    | 28.7              | 38.6 | 53.0                 | 39.4 |
| <b>C</b> | 25.7                                                                                     | 19.7 | 0.25                                                                     | 0.17 | 87.0                            | 77.2 | -                                                                                  | -     | -                                                                                 | -    | 28.7              | 39.2 | 53.0                 | 36.8 |
| NYH51    |                                                                                          |      |                                                                          |      |                                 |      |                                                                                    |       |                                                                                   |      |                   |      |                      |      |
| <b>A</b> | 16.0                                                                                     | 11.0 | 0.11                                                                     | 0.07 | 83.3                            | 77.7 | 378.9                                                                              | 236.0 | 41.2                                                                              | 41.6 | 11.9              | 17.1 | 111.5                | 85.5 |
| <b>B</b> | 16.3                                                                                     | 11.8 | 0.11                                                                     | 0.08 | 83.7                            | 78.6 | 385.7                                                                              | 260.6 | 43.7                                                                              | 40.0 | 11.3              | 16.4 | 112.4                | 89.5 |
| <b>C</b> | 16.3                                                                                     | 11.0 | 0.11                                                                     | 0.07 | 83.7                            | 77.7 | 385.7                                                                              | 236.0 | 43.7                                                                              | 41.6 | 11.3              | 17.1 | 112.4                | 85.5 |

**Supplemental Table 3.** Summary of analysis of variance for crown root number (CN), shoot dry weight (SDW), leaf relative water content (LRWC, %), leaf photosynthesis (LPn,  $\mu\text{mol CO}_2 \text{ m}^{-2} \text{ s}^{-1}$ ), leaf stomatal conductance (LSC,  $\text{mol H}_2\text{O m}^{-2} \text{ s}^{-1}$ ) at anthesis, yield at physiological maturity in the field as influenced by soil moisture regimes (treatment (T)), genotypes (G), crown root phenotypes (P) and their interactions. The associated F-values and probabilities (NS, not significant; \*,  $P<0.05$ ; \*\*,  $P<0.01$ ; \*\*\*,  $P<0.001$ ) are shown.

| Source of variation | CN       | SDW       | LRWC      | LPn       | LSC       | Yield     |
|---------------------|----------|-----------|-----------|-----------|-----------|-----------|
| Treatment (T)       | 68.09*** | 111.31*** | 316.07*** | 363.98*** | 363.06*** | 187.19*** |
| Genotype (G)        | 7.66***  | 3.36**    | 6.03***   | 4.65***   | 1.99NS    | 3.63**    |
| G x T               | 0.76NS   | 2.61*     | 4.45**    | 4.84**    | 2.91**    | 2.36*     |
| phenotypes (P)      | 38.04*** | 3.88*     | 39.78***  | 18.53***  | 3.44*     | 6.80*     |
| P x T               | 3.15NS   | 7.89**    | 28.55***  | 28.7***   | 9.29***   | 9.41***   |

**Supplemental Table 4.** Means of total root surface (TRS, cm<sup>2</sup> ± SE) for the whole soil profile and total root surface in deep soil layers (TRSD) with contrasting crown root number of phenotypes (HCN: high crown root number; LCN: low crown root number) at anthesis in the rainout shelters and in the greenhouse. Deep soil layers mean 40-60 cm in the rainout shelters, and 80-140 cm in the greenhouse. The different letters within the column in the same growing conditions are significantly different at the  $\alpha = 0.05$  level.

| Data sources | Phenotypes | WW              |                | WS             |                |
|--------------|------------|-----------------|----------------|----------------|----------------|
|              |            | TRS             | TRSD           | TRS            | TRSD           |
| Field        | HCN        | 94.06 ± 7.046 a | 18.51 ± 6.68 a | 85.03 ± 6.86 a | 8.34 ± 1.98 a  |
|              | LCN        | 111.13 ± 8.03 a | 25.49 ± 8.29 a | 81.83 ± 5.94 a | 19.66 ± 3.66 b |
| Greenhouse   | HCN        | 2816 ± 89 a     | 795 ± 56 a     | 1713 ± 71 a    | 398 ± 52 a     |
|              | LCN        | 2717 ± 79 a     | 703 ± 47 a     | 1884 ± 75 a    | 703 ± 47 b     |

**Supplemental Table 5.** Means of average root diameter (ARD, mm  $\pm$  SE) in the top soil 0-10 cm and in deep soil layers (ARD) with contrasting crown root number of phenotypes (HCN: high crown root number; LCN: low crown root number) at anthesis in the rainout shelters and in the greenhouse. Deep soil layers means 40-60 cm in the rainout shelters, and 80-140 cm in the greenhouse. The different letters within the column in the same growing conditions are significantly different at the  $\alpha = 0.05$  level.

| Data source | Phenotypes | WW               |                  | WS               |                  |
|-------------|------------|------------------|------------------|------------------|------------------|
|             |            | ARD 0-10         | ARDD             | ARD 0-10         | ARDD             |
| Field       | HCN        | 0.42 $\pm$ 0.03a | 0.49 $\pm$ 0.34a | 0.37 $\pm$ 0.02a | 0.49 $\pm$ 0.05a |
|             | LCN        | 0.42 $\pm$ 0.02a | 0.50 $\pm$ 0.03a | 0.37 $\pm$ 0.02a | 0.47 $\pm$ 0.04a |
| Greenhouse  | HCN        | 0.32 $\pm$ 0.02a | 0.46 $\pm$ 0.03a | 0.30 $\pm$ 0.02a | 0.44 $\pm$ 0.02a |
|             | LCN        | 0.33 $\pm$ 0.02a | 0.44 $\pm$ 0.03a | 0.29 $\pm$ 0.01a | 0.46 $\pm$ 0.02a |

**Supplemental Table 6.** Means of leaf area (m<sup>2</sup> plant<sup>-1</sup>) and leaf number ± SE measured for eight maize recombinant inbred lines (RILs) with contrasting crown root number (HCN: high crown root number; LCN: low crown root number) at anthesis in the rainout shelters in Pennsylvania. The different letters within the column are significantly different at the α = 0.05 level.

| Classification based on CN | RILs   | WW           |               | WS           |              |
|----------------------------|--------|--------------|---------------|--------------|--------------|
|                            |        | Leaf area    | Leaf number   | Leaf area    | Leaf number  |
| HCN                        | IBM009 | 0.38 ± 0.03  | 9.63 ± 0.24   | 0.16 ± 0.01  | 6.90 ± 0.20  |
|                            | OHW170 | 0.37 ± 0.03  | 9.75 ± 0.52   | 0.18 ± 0.02  | 7.38 ± 0.24  |
|                            | NYH47  | 0.35 ± 0.03  | 10.38 ± 0.24  | 0.17 ± 0.03  | 7.63 ± 0.31  |
|                            | NYH57  | 0.41 ± 0.04  | 10.25 ± 0.66  | 0.21 ± 0.01  | 7.95 ± 0.24  |
| LCN                        | IBM123 | 0.37 ± 0.03  | 9.50 ± 0.35   | 0.20 ± 0.02  | 7.01 ± 0.24  |
|                            | OHW74  | 0.41 ± 0.01  | 10.25 ± 0.25  | 0.30 ± 0.02  | 8.88 ± 0.69  |
|                            | NYH51  | 0.36 ± 0.01  | 9.38 ± 0.31   | 0.26 ± 0.03  | 8.58 ± 0.31  |
|                            | NYH224 | 0.36 ± 0.02  | 10.63 ± 0.38  | 0.28 ± 0.03  | 8.79 ± 0.20  |
| Mean                       | HCN    | 0.38 ± 0.01a | 10.25 ± 0.27a | 0.18 ± 0.02a | 7.47 ± 0.16a |
|                            | LCN    | 0.37 ± 0.01a | 9.93 ± 0.20a  | 0.26 ± 0.01b | 8.34 ± 0.25b |

**Supplemental Table 7.** Means of leaf area (dm<sup>2</sup> plant<sup>-1</sup>) and leaf number ± SE measured for eight maize recombinant inbred lines (RILs) with contrasting crown root number (HCN: high crown root number; LCN: low crown root number) at 35 days after planting (DAP) in greenhouse mesocosms. The different letters within the column are significantly different at the α = 0.05 level.

| Classification based on CN | RILs   | WW            |              | WS           |              |
|----------------------------|--------|---------------|--------------|--------------|--------------|
|                            |        | Leaf area     | Leaf number  | Leaf area    | Leaf number  |
| HCN                        | IBM009 | 13.90 ± 1.51  | 7.50 ± 0.29  | 6.57 ± 0.50  | 6.25 ± 0.63  |
|                            | OHW170 | 18.86 ± 0.90  | 8.50 ± 0.29  | 7.01 ± 0.66  | 6.85 ± 0.48  |
|                            | NYH47  | 14.84 ± 0.43  | 8.50 ± 0.65  | 5.53 ± 0.45  | 6.50 ± 0.29  |
|                            | NYH57  | 18.36 ± 1.83  | 9.50 ± 0.29  | 5.88 ± 0.46  | 6.25 ± 0.63  |
| LCN                        | IBM123 | 14.32 ± 0.86  | 7.75 ± 0.25  | 6.62 ± 0.86  | 6.25 ± 0.25  |
|                            | OHW74  | 17.05 ± 2.07  | 9.00 ± 0.41  | 8.88 ± 1.61  | 7.25 ± 0.25  |
|                            | NYH51  | 14.12 ± 0.73  | 8.25 ± 0.48  | 6.89 ± 1.04  | 7.00 ± 0.41  |
|                            | NYH224 | 18.75 ± 1.45  | 8.75 ± 0.48  | 7.19 ± 0.40  | 6.50 ± 0.29  |
| Mean                       | HCN    | 16.49 ± 0.80a | 8.50 ± 0.26a | 6.25 ± 0.28a | 6.44 ± 0.24a |
|                            | LCN    | 16.06 ± 0.79a | 8.44 ± 0.22a | 7.40 ± 0.53b | 6.75 ± 0.17a |



**Supplemental Table 8.** Means of lateral root branching density (LRBD, branch cm<sup>-1</sup>) of crown and crown root angles (CRA, °) ± SE measured for eight maize recombinant inbred lines (RILs) with contrasting crown root number (HCN: high crown root number; LCN: low crown root number) at anthesis in the rainout shelters in Pennsylvania. The different letters within the column are significantly different at the at α = 0.05 level.

| Classification based on CN | RILs          | WW           |              | WS          |               |
|----------------------------|---------------|--------------|--------------|-------------|---------------|
|                            |               | LRBD         | CRA          | LRBD        | CRA           |
| <b>HCN</b>                 | <b>IBM009</b> | 11.43±0.28 a | 48.65±1.13 a | 7.93±0.45 a | 55.95±0.82 ab |
|                            | <b>OHW170</b> | 10.50±0.34 a | 47.38±1.05 a | 7.40±0.93 a | 54.98±1.51 b  |
|                            | <b>NYH47</b>  | 9.85±0.42 a  | 49.38±1.04 a | 7.43±0.53 a | 56.60±0.88 ab |
|                            | <b>NYH57</b>  | 11.00±0.54 a | 47.30±0.91 a | 8.33±0.77 a | 55.77±1.52 ab |
| <b>LCN</b>                 | <b>IBM123</b> | 10.50±0.39 a | 48.85±1.12 a | 7.08±0.37 a | 59.63±1.89 a  |
|                            | <b>OHW74</b>  | 11.35±0.70 a | 50.98±1.47 a | 7.40±0.21 a | 56.25±1.22 ab |
|                            | <b>NYH51</b>  | 9.40±0.74 a  | 48.95±1.04 a | 7.25±0.54 a | 56.08±0.96 ab |
|                            | <b>NYH224</b> | 10.43±0.59 a | 46.90±0.75 a | 7.30±0.43 a | 56.30±1.77 ab |
| <b>Mean</b>                | <b>HCN</b>    | 10.69±0.24 a | 48.18±0.52 a | 7.77±0.33 a | 55.83±0.57 ab |
|                            | <b>LCN</b>    | 10.41±0.33 a | 48.92±0.63 a | 7.26±0.19 a | 57.06±0.78 ab |
